# Supplementary material for: Ixekizumab, an interleukin-17A specific monoclonal antibody, for the treatment of biologic-naive patients with active psoriatic arthritis: results from the 24-week randomised, double-blind, placebo-controlled and active (adalimumab)-controlled period of the phase III trial SPIRIT-P1
Source: PubMed Central journal article supplement — Ann Rheum Dis. 2016 Aug 23;76(1):79–87. doi: 10.1136/annrheumdis-2016-209709 (PMC5264219; doi:10.1136/annrheumdis-2016-209709), 2016-08-23
Supplement: annrheumdis-2016-209709supp1.pdf [file annrheumdis-2016-209709supp1.pdf]

**Online Supplement for**

**Ixekizumab, an Interleukin-17A Specific Monoclonal Antibody, for the Treatment of Biologic-Naive Patients with Active Psoriatic Arthritis: Results from the 24-Week Randomized, Double-Blind, Placebo- and Active (Adalimumab)-Controlled Period of the Phase 3 Trial SPIRIT-P1**

**Table of Contents**

|                                                                                                                                                    |    |
|----------------------------------------------------------------------------------------------------------------------------------------------------|----|
| SPIRIT-P1: List of Principal Investigators and Participating Study Sites.....                                                                      | 3  |
| Study Design and Patient Population.....                                                                                                           | 11 |
| Treatment and Randomization.....                                                                                                                   | 12 |
| American College of Rheumatology (ACR) Response Criteria.....                                                                                      | 15 |
| Leeds Dactylitis Index-Basic (LDI-B).....                                                                                                          | 15 |
| Study Power.....                                                                                                                                   | 16 |
| Additional Statistical Methods.....                                                                                                                | 16 |
| Efficacy Data: ACR Core Set.....                                                                                                                   | 17 |
| References.....                                                                                                                                    | 18 |
| Supplementary Figure S1. Study Design.....                                                                                                         | 19 |
| Supplementary Figure S3. Patient Disposition From Study Treatment During the Double-Blind Treatment Period for the Intent-to-Treat Population..... | 21 |
| Supplementary Table S1. Mean change from baseline in the individual components of the ACR Core Set.....                                            | 25 |
| Supplemental Table S2. Adverse Events of Injection Site Reactions During the 24-Week Double-Blind Period of the SPIRIT-P1 Study.....               | 26 |

Supplemental Table S3. Adverse Events of Infection (Special Safety Topic) During the 24-Week

Double-Blind Period of the SPIRIT-P1 Study..... 27

Supplementary Table S4. Effect on dactylitis symptoms as measured by mean change from baseline in

LDI-B score ..... 29

## **SPIRIT-P1: List of Principal Investigators and Participating Study Sites**

### **MHAT "Trimontium", OOD, Plovdiv, Bulgaria**

Mariela Geneva-Popova

### **ReumaClinic, Genk, Belgium**

Piet Geusens

### **MHAT-Plovdiv AD, Plovdiv, Bulgaria**

Ivan Goranov

### **MHAT "Kaspela", EOOD, Plovdiv, Bulgaria**

Dimitar Penev

### **NMTH "Tsar Boris III", Sofia, Bulgaria**

Antoaneta Toncheva

### **Medical Center "Nov Rehabilitatsionen Tsentar", EOOD, Stara Zagora, Bulgaria**

Stoyanka Vladeva

### **DCC 'Sv. Pantaleymon' OOD, Pleven, Bulgaria**

Kiril Yablanski

### **Groupe de recherche en maladies osseuses Inc., Quebec, Quebec, Canada**

Louis Bessette

### **Toronto Western Hospital, Toronto, Ontario, Canada**

Vinod Chandran

### **Rheumatology Research Associates, Ottawa, Ontario, Canada**

Robert McKendry

### **Probity Medical Research, Waterloo, Ontario, Canada**

Kim Papp

### **CCBR Czech Brno, s.r.o., Brno, Czech Republic**

Michaela Blahova

### **Artroscan s.r.o., Ostrava – Trebovice, Czech Republic**

Ladislav Bortlik

### **Revmatologie Bruntal, s.r.o., Bruntal, Czech Republic**

Dagmar Galatikova

**CCBR Czech, a.s, Pardubice, Czech Republic**

Tomas Hala

**CCBR - Prague – CZ, Praha 3, Czech Republic**

Jolana Hejlova

**Revmatologie s.r.o., Brno, Czech Republic**

Petr Nemecek

**Poliklinika Lipa, Praha 5, Czech Republic**

Lucie Podrazilova

**REVMACLINIC s.r.o, Brno, Czech Republic**

Vlastimil Racek

**Mediscan Group, s.r.o., Praha 11, Czech Republic**

Jan Rosa

**Revmatologicky ustav, Praha 2, Czech Republic**

Liliana Sedova

**Revmatologicka ambulance, Praha 4 Nusle, Czech Republic**

Zuzana Urbanova

**PV - Medical, s.r.o., Zlin, Czech Republic**

Petr Vitek

**East Tallinn Central Hospital, Tallinn, Estonia**

Margus Pail

**North Estonia Medical Centre Foundation, Tallinn, Estonia**

Eve-Kai Raussi

**OÜ Innomedica, Tallinn, Estonia**

Jaak Tälli

**Center for Clinical and Basic Research, Tallinn, Estonia**

Ivo Valter

**CHU de Toulouse - Hôpital Purpan, Toulouse, France**

Alain Cantagrel

**Hôpital Madeleine - CHR Orléans, Orleans, France**

Eric Lespessailles

**CHU Nantes - Hôtel Dieu, Loire Atlantique, France**

Yves Maugars

**Osaka City University Hospital, Osaka-Shi, Osaka-Fu, Japan**

Hitoshi Goto

**Asahikawa Medical College Hospital, Asahikawa-shi, Hokkaido, Japan**

Yuichi Makino

**NHO Kyushu Medical Center, Fukuoka-Shi, Fukuoka-Ken, Japan**

Tomoya Miyamura

**St. Luke's International Hospital, Chuo-ku, Tokyo-To, Japan**

Masato Okada

**Keio University Hospital, Shinjuku-Ku, Tokyo-To, Japan**

Noriyuki Seta

Katsuya Suzuki

**Okayama University Hospital, Okayama-Shi, Okayama-Ken, Japan**

Hiroshi Wakabayashi

Kenei Sada

**CLIDITER SA de CV, Mexico, Distrito Federal, Mexico**

Ruben Burgos Vargas

**Hospital y Clinica OCA SA de CV, Monterrey, Nuevo León, Mexico**

Edmundo De la Garza Ramos

**Hospital Clinica Angeles Chapalita, Guadalajara, Jalisco, Mexico**

Federico Galvan Villegas

**Centro de Alta Especialidad en Reumatología e Investigación del Potosí, S.C, San Luis Potosí, San Luis Potosí, Mexico**

Juan Rizo Rodriguez

**Hospital CIMA Chihuahua, Chihuahua, Chihuahua, Mexico**

Natalia Santana Portillo

**Antonius Ziekenhuis, Sneek, Netherlands**

Ed Griep

**ClinicMed Badurski I wspólnicy Spółka Jawna” w skrócie: ClinicMed Badurski i wsp. Sp.J., Białystok, Poland**

Stefan Daniluk

**Wojewodzki Szpital Specjalistyczny we Wroclawiu, Wroclaw, Poland**

Katarzyna Gruszecka

**NSZOZ Medicus (Niepubliczny Specjalistyczny Zaklad Opieki Zdrowotnej MEDICUS), Sroda Wielkopolska, Poland**

Aleksandra Kolczewska

**Malopolskie Centrum Medyczne s.c., Krakow, Poland**

Mariusz Korkosz

**Reumed Spolka z o.o., Lublin, Poland**

Marcin Mazurek

**Grażyna Pulka Specjalistyczny Ośrodek ALL-MED, Krakow, Poland**

Grazyna Pulka

**Rheuma Medicus Zaklad Opieki Zdrowotnej, Warszawa, Poland**

Maria Rell-Bakalarska

**Solumed S.C., Poznan, Poland**

Anna Rychlewska-Hanczewska

**Krakowskie Centrum Medyczne Sp. z o.o., Krakow, Poland**

Dorota Wielowieyska-Szybinska

**Medica Pro Familia Sp. z o.o. Spolka Komandytowo-Akcyjna, Oddzial Warszawa, Warszawa, Poland**

Agnieszka Zielinska

**Regional Budgetary SHI "Territorial Clinical Hospital", Barnaul, Russia**

Andrey Dorokhov

**SHI Sverdlovsk Regional Clinical Hospital #1, Ekaterinburg, Russia**

Lyudmila Evstigneeva

**Republican Hospital n.a. V.A. Baranov, Petrozavodsk, Russia**

Irina Marusenko

**Scientific Research Medical Complex "Your Health", Kazan, Russia**

Leysan Myasoutova

**SIH Kemerovo Regional Clinical Hospital, Kemerovo, Russia**

Svetlana Smakotina

**Hospital Universitario Marques de Valdecilla, Santander, Cantabria, Spain**

Ricardo Blanco Alonso

**Hospital Universitario Reina Sofia, Córdoba, Córdoba, Spain**

Maria Dolores Lopez Montilla

**Hospital General Carlos Haya, Málaga, Málaga, Spain**

Antonio Fernandez Nebro

**Clinica CIMA, Barcelona, Barcelona, Spain**

Ferran Garcia-Fructuoso

**Corporacio Sanitaria Parc Tauli, Sabadell, Barcelona, Spain**

Jordi Gratacos Masmitja

**Hospital Universitario Nuestra Señora de Valme, Sevilla, Sevilla, Spain**

Jose Luis Marengo de la Fuente

**Hospital Universitario Puerta de Hierro Majadahonda, Majadahonda, Madrid, Spain**

Juan Mulero Mendoza

**Hospital Universitario Virgen Macarena, Sevilla, Sevilla, Spain**

Federico Navarro Sarabia

**Hospital de Basurto, Bilbao, Vizcaya, Spain**

Eduardo Ucar Angulo

**SI NSC M.D. Strazhesko Institute of Cardiology of NAMSU, Kyiv, Ukraine**

Olena Garmish

**MCIC Health Clinic BO LTD TPC Slaomed, Vinnytsia, Ukraine**

Oleksandr Golovchenko

**SRI of Invalid Rehabilitation (educational-scientific-medical complex) of Vinnytsia M.I.Pyrogov  
NMU, Vinnytsia, Ukraine**

Sergii Shevchuk

**Vinnytsia M.I. Pyrogov Regional Clinical Hospital, Vinnytsia, Ukraine**

Mykola Stanislavchuk

**CI of Healthcare Kharkiv CCH #8 Kharkiv MA of PGE of MOHU Ch of Cardiology and Funct  
Diagnostics, Kharkiv, Ukraine**

Vira Tseluyko

**State Institute V.K.Gusak Emergency and Reconstructive Surgery Institute of NAMS of Ukraine,  
Donetsk, Ukraine**

Mykola Vatutin

**New Cross Hospital, Wolverhampton, West Midlands, United Kingdom**

Nichol Barkham

**University Hospital Aintree, Liverpool, Merseyside, United Kingdom**

Nicola Goodson

**St Luke's Hospital, Bradford, West Yorkshire, United Kingdom**

Philip Helliwell

**Chapel Allerton Hospital, Leeds, West Yorkshire, United Kingdom**

Helena Marzo-Ortega

**Addenbrooke's Hospital, Cambridge, Cambridgeshire, United Kingdom**

Andrew Ostor

**King George Hospital, Goodmayes, Essex, United Kingdom**

Euthalia Roussou

**Whipps Cross University Hospital, London, Greater London, United Kingdom**

Hasan Tahir

**Marietta Rheumatology Associates, PC, Marietta, Georgia, USA**

Mohammed Abubaker

**West Tennessee Research Institute, Jackson, Tennessee, USA**

Jacob Aelion

**Medication Management, LLC, Greensboro, North Carolina, USA**

Anthony Anderson

**Box Arthritis & Rheumatology of the Carolinas, PLLC, Charlotte, North Carolina, USA**

Emily Jane Box

**Physicians Clinic of Iowa, PC, Cedar Rapids, Iowa, USA**

Michael Brooks

**Burnette & Silverfield, MDs, PLC, Tampa, Florida, USA**

Michael Burnette

**Pioneer Research Solutions, Inc., Cypress, Texas, USA**

Asif Cochinwala

**Columbia Arthritis Center, P.A., Columbia, South Carolina, USA**

Ronald Collins

Kathleen Flint



**Atlantic Coast Research, Toms River, New Jersey, USA**

Rajat Dhar

**ACME Research, LLC., Orangeburg, South Carolina, USA**

Mitchell Feinman

**Metroplex Clinical Research Center, LLC, Dallas, Texas, USA**

Roy Fleischmann

**RASF - Clinical Research Center, Boca Raton, Florida, USA**

Joseph Forstot

**New England Research Associates LLC, Trumbull, Connecticut, USA**

Geoffrey Gladstein

**Arthritis and Osteoporosis Medical Associates, PLLC, Brooklyn, New York, USA**

David Goddard

**Robert A. Harrell, III, MD, Durham, North Carolina, USA**

Robert Harrell

**Inland Rheumatology Clinical Trials, Inc., Upland, California, USA**

Antony Hou

**Klein and Associates, M.D., P.A., Hagerstown, Maryland, USA**

Mary Howell

**Arthritis Consultants, Inc., St. Louis, Missouri, USA**

Akgun Ince

**Clinical and Translational Research Center of Alabama, PC, Tuscaloosa, Alabama, USA**

Richard Jones

**Mountain State Clinical Research, Clarksburg, West Virginia, USA**

Shelly Kafka

**Altoona Center for Clinical Research, P.C., Duncansville, Pennsylvania, USA**

Alan Kivitz

**Klein and Associates, M.D., P.A., Cumberland, Maryland, USA**

Steven Klein

**Little Rock Diagnostic Clinic, Little Rock, Arkansas, USA**

Cummins Lue

**Seattle Rheumatology Associates, Seattle, Washington, USA**

Philip Mease

**Arthritis Northwest, PLLC, Spokane, Washington, USA**

Eric Mueller

**Joint and Muscle Research Institute, Charlotte, North Carolina, USA**

Alireza Nami

**Arthritis & Osteoporosis Treatment Center, P.A., Orange Park, Florida, USA**

Meera Oza

**Apex Clinical Research, Kennewick, Washington, USA**

Derek Peacock

**University of Rochester, Rochester, New York, USA**

Christopher Ritchlin

**Heartland Research Associates, LLC, Wichita, Kansas, USA**

Shadi Shahouri

**Florida Medical Clinic, P.A., Zephyrhills, Florida, USA**

David Sikes

**Arthritis, Rheumatic & Back Disease Associates, P.A./Rohrer Center for Health Fitness,  
Voorhees, New Jersey, USA**

Sheldon Solomon

**Diagnostic Rheumatology and Research, Indianapolis, Indiana, USA**

Michael Stack

**Rheumatology Associates, Birmingham, Alabama, USA**

Anthony Turkiewicz

**STAT Research, Inc., Dayton, Ohio, USA**

Sanford Wolfe

## Study Design and Patient Population

The SPIRIT-P1 study is a 3-year, phase 3, randomized, double-blind, placebo- and active-controlled clinical trial comparing two regimens of ixekizumab and an active adalimumab reference arm to treatment with placebo. The multicenter study was conducted by 114 investigators, all rheumatologists or dermatologists, at 114 study sites in 15 countries (Belgium, Bulgaria, Canada, Czech Republic, Estonia, France, Japan, Mexico, Netherlands, Poland, Russia, Spain, Ukraine, United Kingdom, and United States of America). Enrollment began in January 2013, and the last patient completed the 24-week double-blind treatment period in December 2014. Recruitment was limited to patients not previously treated with biologic agents for plaque psoriasis or psoriatic arthritis (PsA). The study was designed by rheumatology experts in collaboration with representatives of the sponsor (Eli Lilly and Company). Responsibilities for Quintiles Inc., a contract research organization, included the collection and validation of study data. Writing and editorial assistance were provided by medical writers contracted with ClinGenuity LLC, Cincinnati, OH. All authors made revisions to the first and subsequent drafts of the manuscript and vouch for the accuracy and completeness of data reported. The study was conducted in accordance with Good Clinical Practice, with consensus ethics guidelines derived from international guidelines such as the Declaration of Helsinki, and local laws and regulations. At each study center, institutional review boards or independent ethics committees approved the study protocol and informed consent forms. All patients gave written informed consent.

Study eligibility requirements were patients  $\geq 18$  years of age with a diagnosis of PsA for  $\geq 6$  months and who fulfilled the Classification Criteria for Psoriatic Arthritis (CASPAR).[1] Additional disease state eligibility requirements were as follows:  $\geq 3$  of 68 tender joint count and  $\geq 3$  of 66 swollen joint count; either  $\geq 1$  PsA-related hand or foot joint erosion or C-reactive protein  $> 6$  mg/L; and evidence of psoriasis (current or personal history). Principal exclusion criteria were history of malignant disease (other than non-melanoma skin cancer or in situ cervical carcinoma, successfully treated and with no recurrences within the past 5 years); recent infection requiring hospitalization or antibiotic treatment; positive testing for hepatitis B, hepatitis C, or human immunodeficiency virus; liver function or hematology test results outside of predefined limits; or any history of biologic treatment for plaque psoriasis or PsA.

## **Treatment and Randomization**

Patients were randomized at a 1:1:1:1 ratio to 1 of 4 treatment groups: ixekizumab 80 mg every 2 weeks (IXEQ2W), ixekizumab 80 mg every 4 weeks (IXEQ4W), adalimumab 40 mg Q2W, or placebo, all administered via subcutaneous injection (see online supplementary figure S1). Patients randomized to IXEQ4W or IXEQ2W were administered a starting dose of 160 mg given as two injections at week 0.

Patients who were identified as Inadequate Responders at week 16 received rescue medication (addition or modification to concomitant medications, described below) and either remained on their originally assigned dose of ixekizumab or, if receiving adalimumab or placebo, were re-randomized to IXEQ2W or IXEQ4W in a 1:1 ratio. Inadequate Responders from the adalimumab treatment group received 8 weeks of placebo as a washout therapy prior to initiating ixekizumab treatment at week 24. Additionally, Inadequate Responders from the adalimumab or placebo treatment groups were administered a starting dose of 160 mg given as two injections at week 24 and week 16, respectively.

Because the different randomized treatments used distinct schedules, distinguishable prefilled syringes, and differing times for IXE starting doses, a double-dummy design with Q2W dosing was employed to conceal treatment allocation. Overall, the double-dummy design was devised so that all patients received 3 injections at weeks 0, 16, and 24, and 2 injections at weeks 2, 4, 6, 8, 10, 12, 14, 18, 20, and 22 (online supplementary figure S2).

## **Concomitant Therapy and Rescue Medication**

Treatment with concomitant therapies was allowed during the double-blind period of the study. Patients taking permitted medications were required to be on a chronic, stable dose at baseline (week 0) through week 24 (inclusive), unless a change was required for safety reasons or for rescue medication for Inadequate Responders at week 16.

The following concomitant therapies were permitted:

- NSAIDs (including COX-2 inhibitors) and Analgesics
  - Up to the maximum recommended doses for pain
- cDMARDs
  - MTX: Up to 25 mg/week
  - Hydroxychloroquine: Up to 400 mg/day
  - Leflunomide: Up to 20 mg/day
  - Sulfasalazine: Up to 3 g/day
- Topical Steroids
  - Class 6 (mild)
  - Class 7 (least potent)
- Oral Corticosteroids
  - Up to 10 mg/day of prednisone (or its equivalent)
- Inhaled Steroids for asthma
- Other Concomitant Therapies for Ps
  - Shampoos, not containing >3% salicylic acid, corticosteroids, coal tar, or vitamin D3 analogues
  - Topical Products, not containing urea, >3% salicylic acid, alpha- or beta-hydroxyl acids, corticosteroids, or vitamin D3 analogues
  - Bath Oils/Oatmeal Bath Preparations
- Other Concomitant Medications for Concomitant Diseases

**Rescue Medication (at Week 16):** Patients who were identified as Inadequate Responders at week 16 were required to modify their concomitant medication by adjusting the dose of existing medication(s) and/or introduction of new medication(s). Modifications made at week 16 must have remained in place and unchanged throughout the remainder of the double-blind period of the study. The following medications were eligible for modification: NSAIDs and opiate analgesics, cDMARDs, and oral

annrheumdis-2016-209709.R2\_Mease et al.\_Online Supplement  
corticosteroids. Additionally, one intra-articular injection of a corticosteroid was permitted for  
Inadequate Responders.

## **American College of Rheumatology (ACR) Response Criteria**

An ACR20 response is defined as  $\geq 20\%$  improvement from baseline in the number of tender joints (Tender Joint Count [TJC]) and number of swollen joints (Swollen Joint Count [SJC]), as well as  $\geq 20\%$  improvement in 3 of the 5 following domains: Patient's Assessment of Pain Visual Analog Scale (Pain VAS), Patient's Global Assessment of Disease Activity (PatGA) VAS, and Physician's Global Assessment of Disease Activity (PGA) VAS (on scales of 0-100), patient's assessment of disability (Health Assessment Questionnaire-Disability Index on a scale ranging from 0 to 3), [2, 3] and an acute-phase reactant as measured by high-sensitive (assay) C-reactive protein (CRP) in mg/L. An ACR50 response is defined as  $\geq 50\%$  improvement, and an ACR70 response is defined as  $\geq 70\%$  improvement in the above criteria.

## **Leeds Dactylitis Index-Basic (LDI-B)**

If the patient had dactylitis (qualitatively assessed by the investigator), the LDI-B was administered by site personnel. The LDI-B was developed to measure the severity of dactylitis. [4, 5] The LDI-B total score is based on the presence of dactylitis in a digit(s). For each digit that is dactylitic, as defined by a minimum increase of 10% in circumference of the dactylitic digit (A) over the contra-lateral digit (B), the ratio (A/B) of the circumference of the affected digit to the circumference of the digit on the opposite hand or foot is measured. If the same digits on each hand or foot are thought to be involved, the clinician refers to a table of normative values for a value which will be used to provide the comparison; this concept is also applied if there is a contralateral missing finger or toe.

The calculated ratio (A/B) is then subtracted by 1, multiplied by 100 and then multiplied by a tenderness score (C) of 0 (not tender) or 1 (tender). The results of each digit are then added to produce the LDI-B total score. Originally, the tenderness score was based upon the Ritchie index (graded 0 to 3), rather than a binary score of 0 or 1. The original method is referred to as the LDI, and the method based upon the binary tenderness score is referred to as the LDI-B. [4, 5]

## Study Power

Randomization of 412 patients (103 per treatment arm) was expected to provide  $\geq 99\%$  power to test the superiority of each of the ixekizumab regimens versus placebo for ACR20 at week 24, assuming a response rate of 48% for each ixekizumab regimen versus 15% for placebo using a 2-sided Fisher's exact test at an alpha level of 0.025. This was also expected to have approximately 90% power to test the superiority of each ixekizumab dose regimen versus placebo for change from baseline in van der Heijde modified Total Sharp Score (mTSS) at week 24 using a 2-sided t-test at an alpha level of 0.025, assuming a difference of 0.59 between placebo and ixekizumab and a standard deviation of 1.19. The adalimumab 40 mg Q2W treatment arm served as an active reference arm for comparison with placebo. The study was not powered to test equivalence or non-inferiority of ixekizumab versus adalimumab.

## Additional Statistical Methods

The following additional analyses were performed on the mTSS assessments: the percentage of patients with no change in mTSS from baseline ( $\leq 0.0$ ), the percentage with mTSS change  $\leq 0.5$  (a threshold based on studies in the literature), [6, 7] and the percentage with mTSS change  $\leq 0.95$  (based on the smallest detectable change as calculated from the variability in scores assigned by the imaging readers using the method of Bruynesteyn et al). [8] A linear extrapolation method was used to impute missing data. [9]



**Efficacy Data: ACR Core Set**

The mean change from baseline for each individual component of the ACR Core Set is presented in Supplementary Table S1 and Supplementary Figure S4. At weeks 12 and 24, significantly greater improvements from baseline in TJC, SJC, Pain VAS, PatGA VAS, PGA VAS, HAQ-DI, and hs-CRP were observed for IXEQ4W and IXEQ2W versus placebo ( $p \leq 0.01$ ). At weeks 12 and 24, mean reductions in TJC, SJC, Pain VAS, PatGA VAS, PGA VAS, and HAQ-DI were significantly greater in patients receiving adalimumab than in those receiving placebo ( $p \leq 0.025$ ); the mean change from baseline in hs-CRP was significantly different between adalimumab and placebo at week 12.

**Efficacy Data: LDI-B**

The pre-specified analyses for baseline LDI-B score and change from baseline in LDI-B score are presented in Supplementary Table S4. These analyses assessed patients who were qualitatively assessed by the investigator to have dactylitis at baseline. At baseline, the LDI-B score for the adalimumab group (93.9) was significantly elevated in comparison to the score for the placebo group (46.2) ( $p < 0.05$ ). No statistical difference was noted in baseline LDI-B score in either ixekizumab group compared to the placebo group. Mean reductions in LDI-B score at week 24 were significantly greater in patients receiving IXEQ4W (-57.1), IXEQ2W (-48.3), and adalimumab (-57.1) than in those receiving placebo (-25.4) ( $p \leq 0.01$ ).

Additionally, in patients with dactylitis and a baseline LDI-B score  $> 0$ , baseline LDI-B score and change from baseline in LDI-B score were assessed post-hoc. Comparable to the aforementioned pre-specified analysis, patients with a baseline LDI-B score  $> 0$  in the adalimumab group (119.9) had a greater baseline LDI-B score compared to patients in the placebo group (62.7) ( $p < 0.05$ ). The baseline LDI-B score of either ixekizumab group was not significantly different from the placebo group. At week 24, patients receiving IXEQ4W (-75.4), IXEQ2W (-66.1), and adalimumab (-76.0) had significant improvements from baseline in LDI-B score compared to patients receiving placebo (-33.7) ( $p \leq 0.01$ ).

## References

1. Taylor W, Gladman D, Helliwell P, et al. Classification criteria for psoriatic arthritis: development of new criteria from a large international study. *Arthritis Rheum* 2006;54:2665-73.
2. Fries JF, Spitz P, Kraines RG, et al. Measurement of patient outcome in arthritis. *Arthritis Rheum* 1980;23:137-45.
3. Fries JF, Spitz PW, Young DY. The dimensions of health outcomes: the health assessment questionnaire, disability and pain scales. *J Rheumatol* 1982;9:789-93.
4. Helliwell PS, Firth J, Ibrahim GH, et al. Development of an assessment tool for dactylitis in patients with psoriatic arthritis. *J Rheumatol* 2005;32:1745-50.
5. Healy PJ, Helliwell PS. Measuring dactylitis in clinical trials: which is the best instrument to use? *J Rheumatol* 2007;34:1302-6.
6. van der Heijde D, Fleischmann R, Wollenhaupt J, et al. Effect of different imputation approaches on the evaluation of radiographic progression in patients with psoriatic arthritis: results of the RAPID-PsA 24-week phase III double-blind randomised placebo-controlled study of certolizumab pegol. *Ann Rheum Dis* 2014;73:233-7.
7. van der Heijde D LR, Mease PJ, McInnes IB, Conaghan PG, Pricop L, Ligozio G, Richards H, and Mporu S. Secukinumab, a monoclonal antibody to interleukin-17A, provides significant and sustained inhibition of joint structural damage in active psoriatic arthritis regardless of prior TNF inhibitors or concomitant methotrexate: a phase 3 randomized, double-blind, placebo-controlled study [abstract]. *Arthritis & Rheumatology* 2014;66:Suppl S10.
8. Bruynesteyn K, Boers M, Kostense P, et al. Deciding on progression of joint damage in paired films of individual patients: smallest detectable difference or change. *Ann Rheum Dis* 2005;64:179-82.
9. Landewe R, Strand V, van der Heijde D. From inhibition of radiographic progression to maintaining structural integrity: a methodological framework for radiographic progression in rheumatoid arthritis and psoriatic arthritis clinical trials. *Ann Rheum Dis* 2013;72:1113-7.

## Supplementary Figure S1. Study Design.

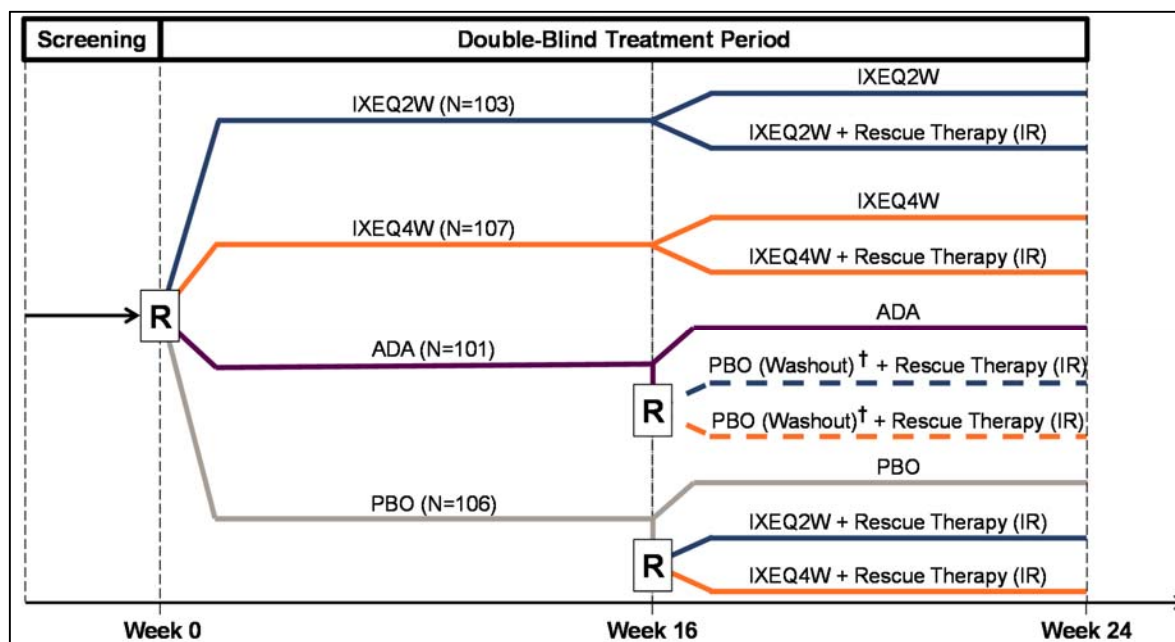

Abbreviations: ADA=40 mg adalimumab every 2 weeks (active reference arm); IR=Inadequate Responder; IXEQ2W=80 mg ixekizumab every 2 weeks; IXEQ4W=80 mg ixekizumab every 4 weeks; PBO=placebo every 2 weeks; R=randomization.

All patients administered ixekizumab received a 160-mg starting dose (as 2 injections) followed by 80 mg every 2 or every 4 weeks. Patients were designated at week 16 as Inadequate Responders if they did not meet pre-defined criteria for changes in both tender joint count and swollen joint count from baseline. The investigators, study personnel, and patients were blinded to the predefined rescue criteria. Inadequate Responders were required to add or modify concomitant medications.

Inadequate Responders at Week 16:

IXEQ2W: Received rescue therapy. Continued to receive 80 mg ixekizumab every 2 weeks.

IXEQ4W: Received rescue therapy. Continued to receive 80 mg ixekizumab every 4 weeks.

ADA: Received rescue therapy. Re-randomized (1:1) to either IXEQ2W or IXEQ4W, but first went through a blinded PBO washout for 8 weeks.

PBO: Received rescue therapy. Re-randomized (1:1) to either IXEQ2W or IXEQ4W.

†IRs at Week 16, who were initially randomized to ADA, underwent an 8-week PBO washout before starting IXEQ2W or IXEQ4W at Week 24.

Supplementary Figure S2 Injection Schedule.

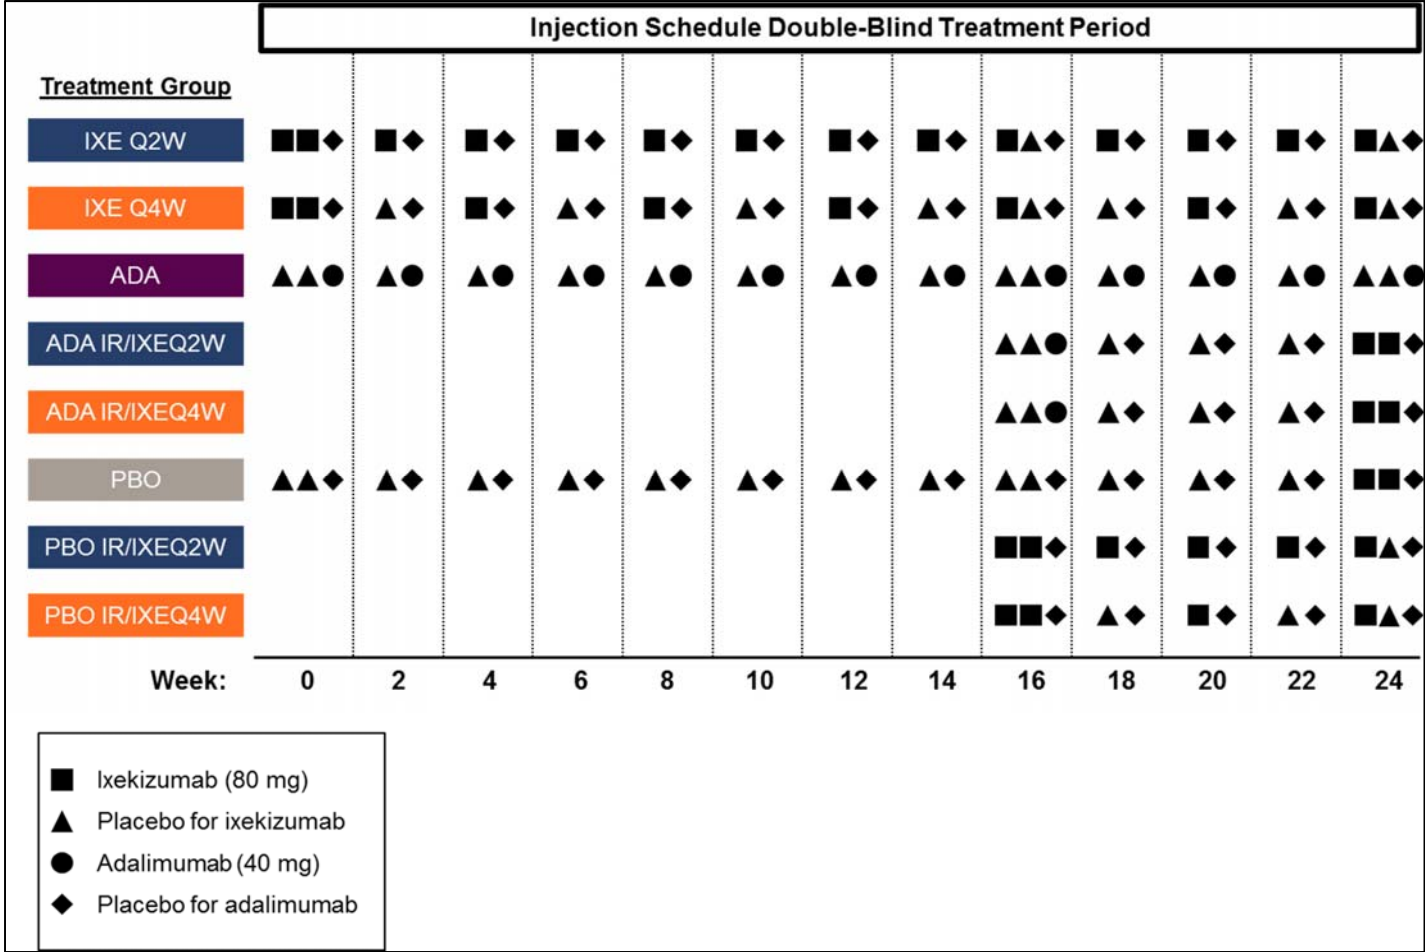

Abbreviations: ADA=40 mg adalimumab every 2 weeks (active reference arm); IR=inadequate responder; IXEQ2W=80 mg ixekizumab every 2 weeks; IXEQ4W=80 mg ixekizumab every 4 weeks; PBO=placebo every 2 weeks.

**Supplementary Figure S3. Patient Disposition From Study Treatment During the Double-Blind Treatment Period for the Intent-to-Treat Population.**

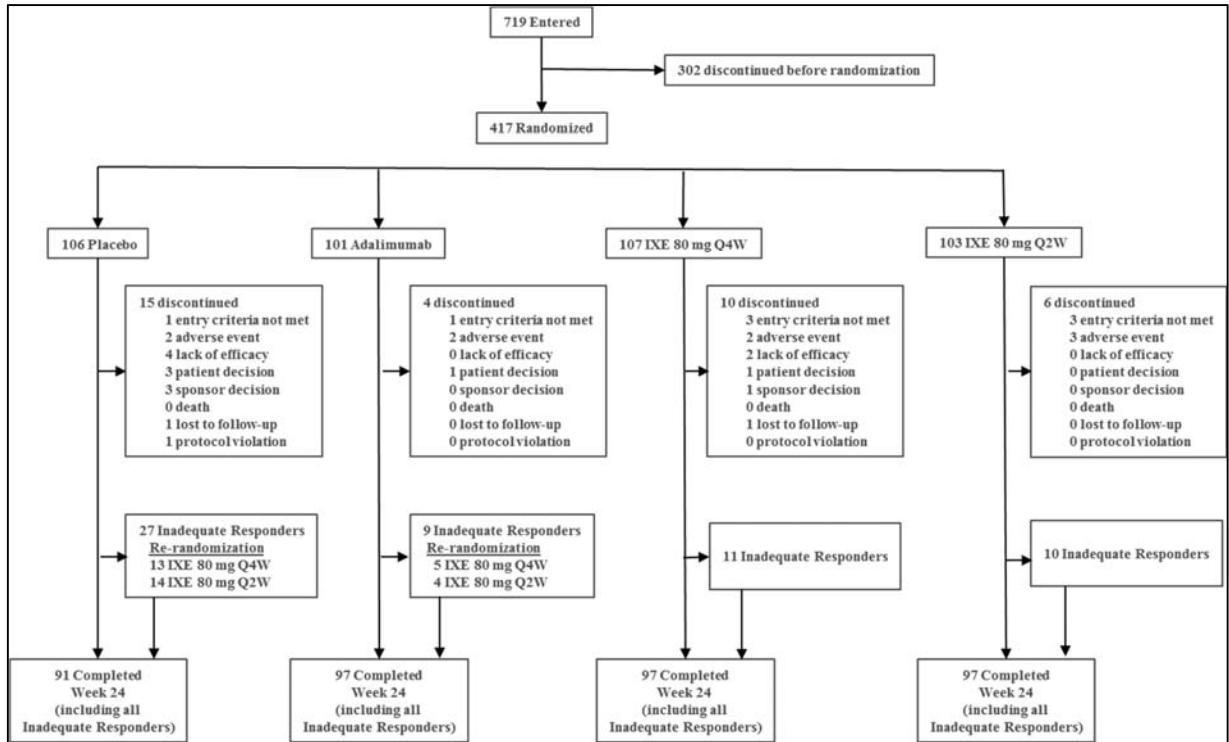

Abbreviations: IXE 80 mg Q2W=80 mg ixekizumab every 2 weeks; IXE 80 mg Q4W=80 mg ixekizumab every 4 weeks.

### Supplementary Figure S4. Time Course of Individual Components of ACR Core Set

The least-square mean changes in TJC (A), SJC (B), Pain VAS (C), PatGA VAS (D), PGA VAS (E), HAQ-DI (F), and hsCRP (G) scores are shown. Error bars represent standard error calculations. <sup>a</sup>Active reference arm for comparison with placebo. The study was not powered to test equivalence or non-inferiority of ixekizumab versus adalimumab.

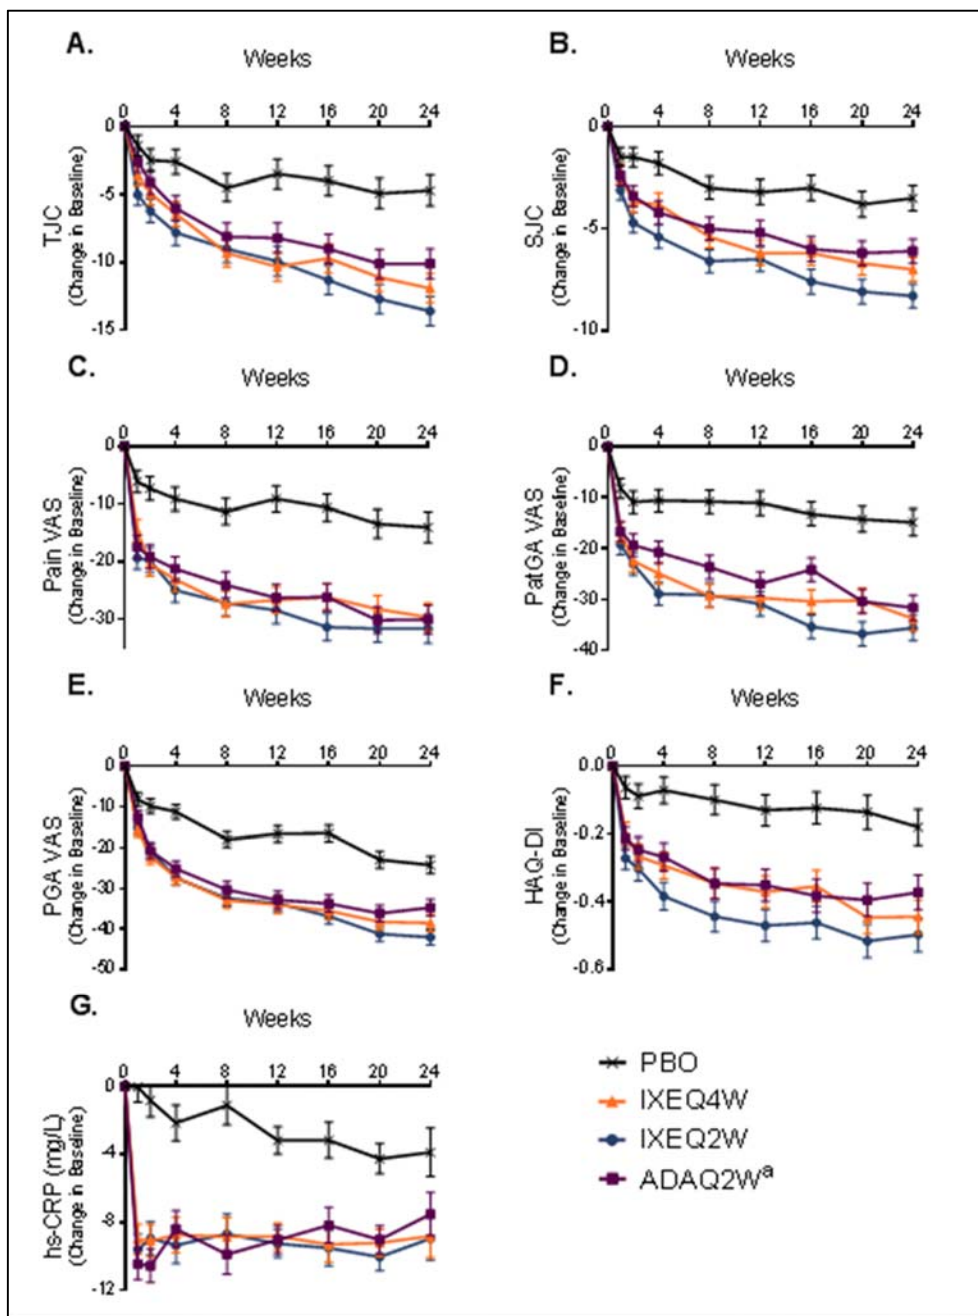

### Supplementary Figure S5. Time Course of Disease Assessment

The least-square mean changes in DAS28-CRP (A), LDI-B scores (B), and LEI scores (C) are shown. LDI-B was measured in patients with the presence of dactylitis at baseline and baseline LDI-B>0. LEI was measured in patients with the presence of enthesitis at baseline. Error bars represent standard error calculations. <sup>a</sup>Active reference arm for comparison with placebo. The study was not powered to test equivalence or non-inferiority of ixekizumab versus adalimumab.

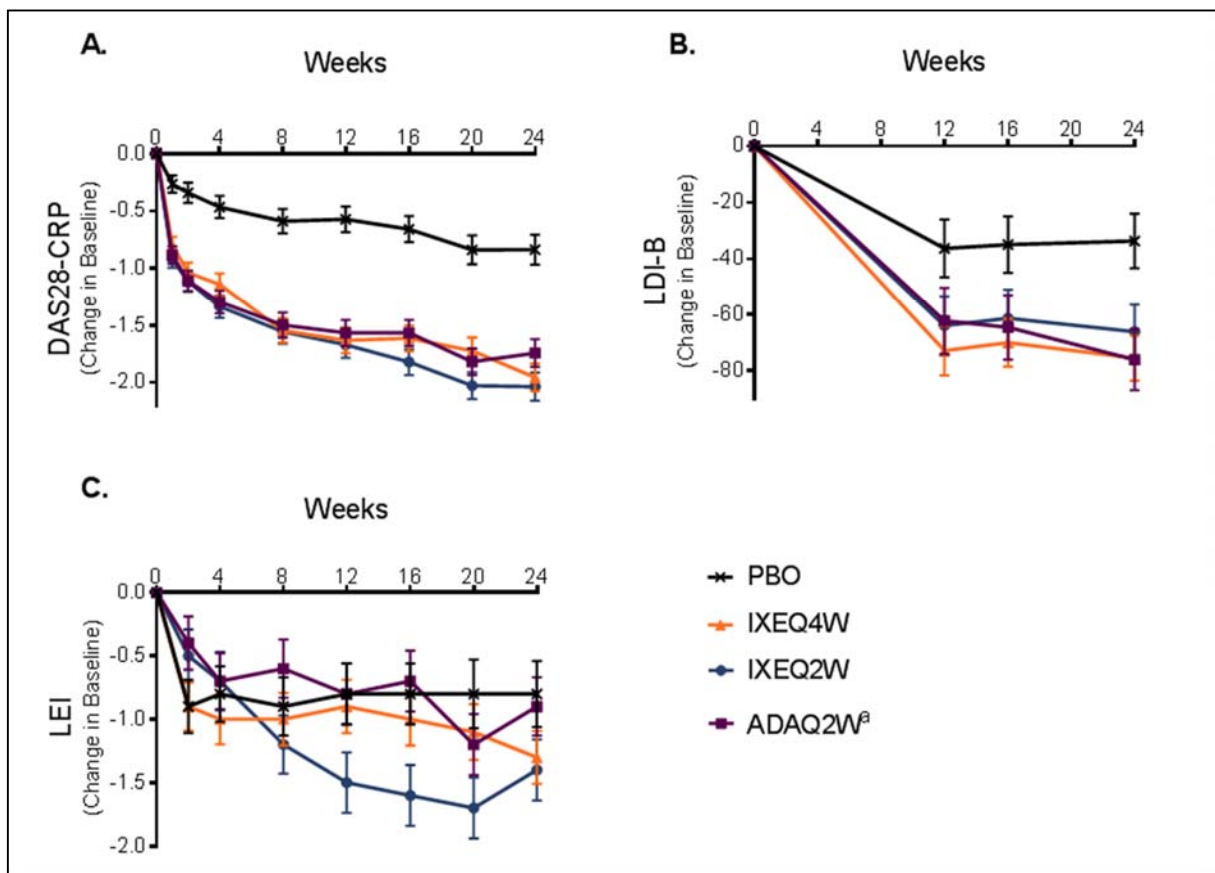

**Supplementary Figure S6. Time Course of Dactylitis or Enthesitis Resolution.**

The percentages of patients achieving complete resolution of dactylitis (LDI-B=0) (A) and enthesitis (LEI=0) (B). LDI-B=0 was measured in patients with the presence of dactylitis at baseline and baseline LDI-B>0. LEI=0 was measured in patients with the presence of enthesitis at baseline and baseline LEI>0. Patients with inadequate responses to treatment at week 16 or missing data were analyzed as non-response up to week 24. <sup>a</sup>Active reference arm for comparison with placebo. The study was not powered to test equivalence or non-inferiority of ixekizumab versus adalimumab.

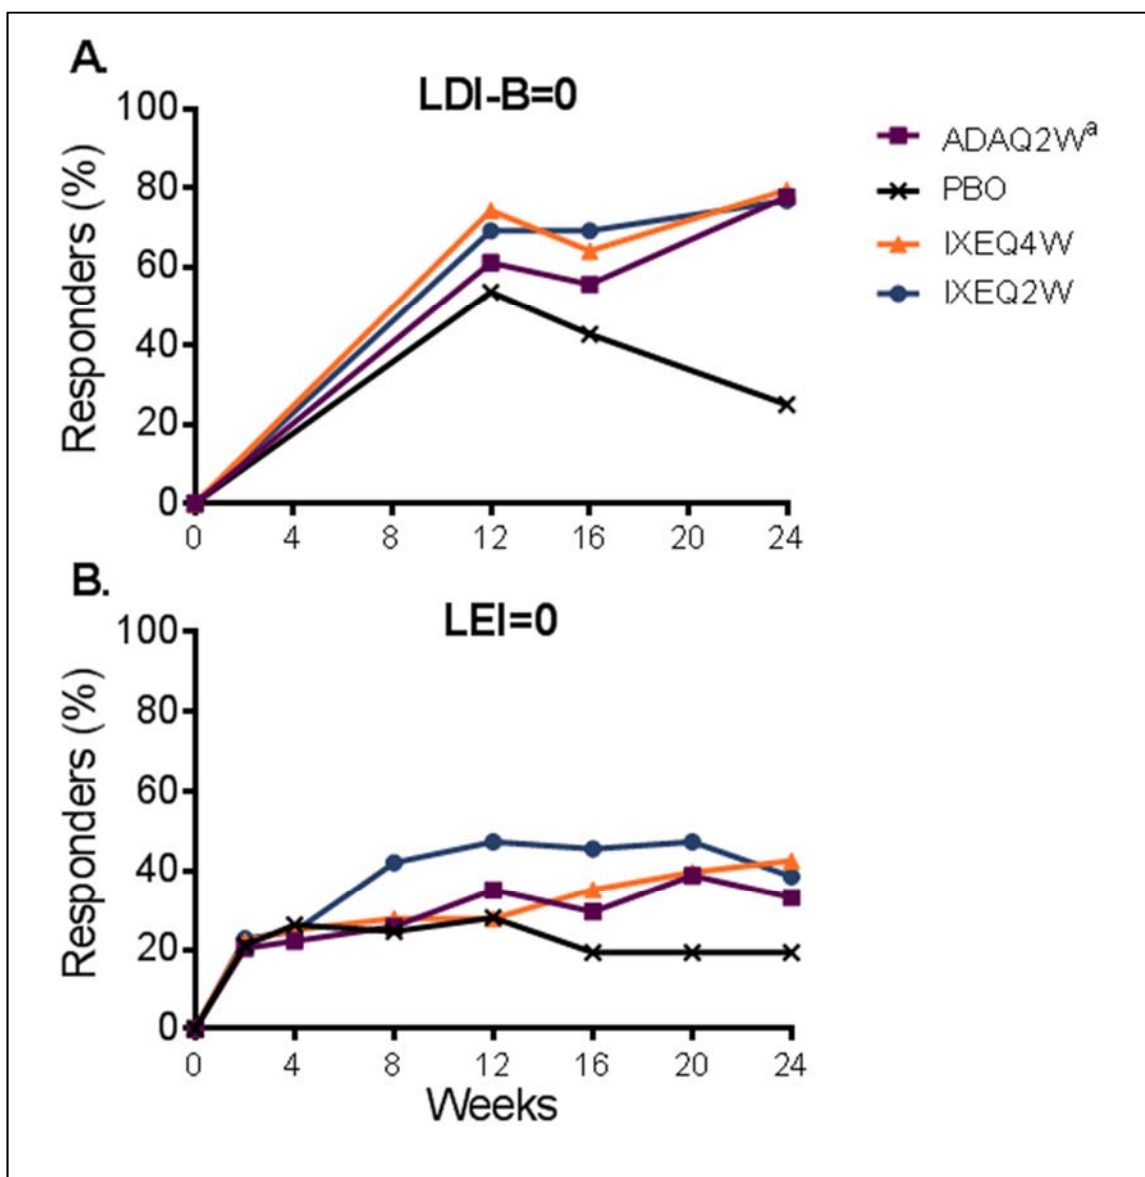



**Supplementary Table S1. Mean change from baseline in the individual components of the ACR Core Set**

|                                           | Placebo<br>N=106 |              | IXEQ4W<br>N=107 |                | IXEQ2W<br>N=103 |                | Adalimumab<br>40 mg Q2W <sup>a</sup><br>N=101 |                |
|-------------------------------------------|------------------|--------------|-----------------|----------------|-----------------|----------------|-----------------------------------------------|----------------|
|                                           | 12 weeks         | 24 weeks     | 12 weeks        | 24 weeks       | 12 weeks        | 24 weeks       | 12 weeks                                      | 24 weeks       |
| <b>LS Mean Change from Baseline (SE):</b> |                  |              |                 |                |                 |                |                                               |                |
| TJC                                       | -3.5 (1.1)       | -4.7 (1.1)   | -10.3 (1.1) *   | -11.9 (1.1) *  | -9.9 (1.1) *    | -13.6 (1.1) *  | -8.2 (1.1) †                                  | -10.1 (1.1) *  |
| SJC                                       | -3.2 (0.6)       | -3.5 (0.6)   | -6.2 (0.6) *    | -7.0 (0.6) *   | -6.5 (0.6) *    | -8.3 (0.6) *   | -5.2 (0.6) ‡                                  | -6.1 (0.6) †   |
| Pain VAS                                  | -9.1 (2.3)       | -14.0 (2.7)  | -26.6 (2.3) *   | -29.6 (2.5) *  | -28.4 (2.3) *   | -31.6 (2.5) *  | -26.2 (2.3) *                                 | -30.0 (2.5) *  |
| PatGA VAS                                 | -11.1 (2.3)      | -14.8 (2.7)  | -29.7 (2.4) *   | -33.8 (2.5) *  | -30.9 (2.4) *   | -35.6 (2.5) *  | -26.9 (2.4) *                                 | -31.6 (2.5) *  |
| PGA VAS                                   | -16.6 (2.1)      | -24.2 (2.1)  | -34.0 (2.1) *   | -38.5 (2.1) *  | -33.6 (2.1) *   | -42.0 (2.0) *  | -32.8 (2.2) *                                 | -34.7 (2.1) *  |
| HAQ-DI <sup>b</sup>                       | -0.13 (0.05)     | -0.18 (0.05) | -0.37 (0.05) *  | -0.44 (0.05) * | -0.47 (0.05) *  | -0.50 (0.05) * | -0.35 (0.05) *                                | -0.37 (0.05) † |
| hs-CRP (mg/L)                             | -3.2 (0.8)       | -3.9 (1.4)   | -8.8 (0.8) *    | -8.8 (1.3) †   | -9.2 (0.8) *    | -8.9 (1.3) †   | -9.0 (0.8) *                                  | -7.5 (1.3)     |

Abbreviations: HAQ-DI=Health Assessment Questionnaire-Disability Index; hs-CRP=high-sensitivity (assay) C-reactive protein; IXEQ2W=80 mg ixekizumab once every 2 weeks; IXEQ4W=80 mg ixekizumab once every 4 weeks; LS=least squares; Pain =Patient Assessment of Pain; PatGA=Patient Global Assessment of Disease Activity; PGA=Physician Global Assessment of Disease Activity; Q2W=every 2 weeks; SE=standard error; SJC=Swollen Joint Count; TJC=Tender Joint Count; VAS=Visual Analog Scale.

<sup>a</sup>The adalimumab 40 mg Q2W treatment arm served as active reference for comparison with placebo. The study was not powered to test equivalence or non-inferiority of ixekizumab versus adalimumab.

<sup>b</sup>Additionally presented in Table 2.

\*p≤0.001 versus placebo.

†p≤0.01 versus placebo.

‡p≤0.025 versus placebo.

**Supplemental Table S2. Adverse Events of Injection Site Reactions During the 24-Week Double-Blind Period of the SPIRIT-P1 Study**

|                                               | Placebo<br>(N=106) | IXEQ4W<br>(N=107) | IXEQ2W<br>(N=102) | Adalimumab 40<br>mg Q2W <sup>a</sup><br>(N=101) |
|-----------------------------------------------|--------------------|-------------------|-------------------|-------------------------------------------------|
| Injection Site Reactions <sup>b</sup> , n (%) | 5 (4.7)            | 26 (24.3) *       | 27 (26.5) *       | 6 (5.9)                                         |
| Mild                                          | 2 (1.9)            | 22 (20.6)         | 22 (21.6)         | 5 (5.0)                                         |
| Moderate                                      | 2 (1.9)            | 3 (2.8)           | 4 (3.9)           | 1 (1.0)                                         |
| Severe                                        | 1 (0.9)            | 1 (0.9)           | 1 (1.0)           | 0                                               |
| Reaction <sup>c</sup> , n (%)                 | 0                  | 13 (12.1) *       | 16 (15.7) *       | 2 (2.0)                                         |
| Erythema <sup>c</sup> , n (%)                 | 0                  | 7 (6.5) ‡         | 13 (12.7) *       | 2 (2.0)                                         |
| Haematoma <sup>c</sup> , n (%)                | 0                  | 1 (0.9)           | 2 (2.0)           | 0                                               |
| Pruritus <sup>c</sup> , n (%)                 | 0                  | 1 (0.9)           | 2 (2.0)           | 0                                               |
| Bruising <sup>c</sup> , n (%)                 | 1 (0.9)            | 2 (1.9)           | 0                 | 2 (2.0)                                         |
| Pain <sup>c</sup> , n (%)                     | 3 (2.8)            | 2 (1.9)           | 0                 | 1 (1.0)                                         |
| Swelling <sup>c</sup> , n (%)                 | 0                  | 0                 | 2 (2.0)           | 0                                               |
| Discolouration <sup>c</sup> , n (%)           | 0                  | 0                 | 1 (1.0)           | 0                                               |
| Hypersensitivity <sup>c</sup> , n (%)         | 0                  | 0                 | 1 (1.0)           | 0                                               |
| Papule <sup>c</sup> , n(%)                    | 0                  | 0                 | 1 (1.0)           | 0                                               |
| Rash <sup>c</sup> , n (%)                     | 1 (0.9)            | 1 (0.9)           | 0                 | 0                                               |

Abbreviations: IXEQ4W=80 mg ixekizumab every 4 weeks; IXEQ2W=80 mg ixekizumab every 2 weeks;

MedDRA=Medical Dictionary for Regulatory Activities; Q2W=every 2 weeks.

<sup>a</sup>The adalimumab 40 mg Q2W treatment arm served as active reference for comparison with placebo. The study was not powered to test equivalence or non-inferiority of ixekizumab versus adalimumab.

<sup>b</sup>MedDRA, version 17.1, High Level Term.

<sup>c</sup>MedDRA, version 17.1, Preferred Term. The preceding 'Injection site' for each Preferred Term, was removed for reader ease; for example, the full Preferred Term for 'Erythema' is 'Injection site erythema'.

\*p≤0.001 versus placebo.

‡p≤0.025 versus placebo.

**Supplemental Table S3. Adverse Events of Infection (Special Safety Topic) During the 24-Week Double-Blind Period of the SPIRIT-P1 Study**

|                                          | Placebo<br>(N=106) | IXEQ4W<br>(N=107) | IXEQ2W<br>(N=102) | Adalimumab<br>40 mg Q2W <sup>a</sup><br>(N=101) |
|------------------------------------------|--------------------|-------------------|-------------------|-------------------------------------------------|
| Nasopharyngitis, n (%)                   | 5 (4.7)            | 7 (6.5)           | 3 (2.9)           | 7 (6.9)                                         |
| Upper respiratory tract infection, n (%) | 7 (6.6)            | 5 (4.7)           | 3 (2.9)           | 5 (5.0)                                         |
| Bronchitis, n (%)                        | 3 (2.8)            | 3 (2.8)           | 3 (2.9)           | 4 (4.0)                                         |
| Conjunctivitis, n (%)                    | 0                  | 2 (1.9)           | 1 (1.0)           | 0                                               |
| Oral herpes, n (%)                       | 1 (0.9)            | 2 (1.9)           | 1 (1.0)           | 1 (1.0)                                         |
| Pharyngitis, n (%)                       | 1 (0.9)            | 1 (0.9)           | 2 (2.0)           | 0                                               |
| Folliculitis, n (%)                      | 0                  | 1 (0.9)           | 1 (1.0)           | 0                                               |
| Gastroenteritis viral, n (%)             | 0                  | 1 (0.9)           | 1 (1.0)           | 0                                               |
| Rhinitis, n (%)                          | 0                  | 0                 | 2 (2.0)           | 1 (1.0)                                         |
| Sinusitis, n (%)                         | 3 (2.8)            | 1 (0.9)           | 1 (1.0)           | 2 (2.0)                                         |
| Urinary tract infection, n (%)           | 2 (1.9)            | 2 (1.9)           | 0                 | 4 (4.0)                                         |
| Acute tonsillitis, n (%)                 | 0                  | 1 (0.9)           | 0                 | 0                                               |
| Body tinea, n (%)                        | 0                  | 0                 | 1 (1.0)           | 0                                               |
| Cystitis, n (%)                          | 1 (0.9)            | 1 (0.9)           | 0                 | 1 (1.0)                                         |
| Gastroenteritis, n (%)                   | 0                  | 1 (0.9)           | 0                 | 0                                               |
| Herpes zoster, n (%)                     | 0                  | 0                 | 1 (1.0)           | 0                                               |
| Influenza, n (%)                         | 0                  | 1 (0.9)           | 0                 | 2 (2.0)                                         |
| Injection site cellulitis, n (%)         | 0                  | 1 (0.9)           | 0                 | 0                                               |
| Laryngitis, n (%)                        | 1 (0.9)            | 0                 | 1 (1.0)           | 0                                               |
| Localized infection, n (%)               | 0                  | 1 (0.9)           | 0                 | 0                                               |
| Lyme disease, n (%)                      | 0                  | 0                 | 1 (1.0)           | 0                                               |
| Oesophageal candidiasis, n (%)           | 0                  | 0                 | 1 (1.0)           | 0                                               |
| Onychomycosis, n (%)                     | 0                  | 1 (0.9)           | 0                 | 0                                               |
| Oral candidiasis, n (%)                  | 0                  | 1 (0.9)           | 0                 | 0                                               |
| Otitis media, n (%)                      | 3 (2.8)            | 0                 | 1 (1.0)           | 0                                               |

|                                          | Placebo<br>(N=106) | IXEQ4W<br>(N=107) | IXEQ2W<br>(N=102) | Adalimumab<br>40 mg Q2W <sup>a</sup><br>(N=101) |
|------------------------------------------|--------------------|-------------------|-------------------|-------------------------------------------------|
| Periodontitis, n (%)                     | 0                  | 0                 | 1 (1.0)           | 0                                               |
| Pharyngitis streptococcal, n (%)         | 0                  | 0                 | 1 (1.0)           | 1 (1.0)                                         |
| Pseudomembranous colitis, n (%)          | 0                  | 0                 | 1 (1.0)           | 0                                               |
| Respiratory tract infection viral, n (%) | 0                  | 0                 | 1 (1.0)           | 0                                               |
| Skin infection, n (%)                    | 0                  | 0                 | 1 (1.0)           | 0                                               |
| Tooth abscess, n (%)                     | 1 (0.9)            | 0                 | 1 (1.0)           | 0                                               |
| Viral pharyngitis, n (%)                 | 1 (0.9)            | 1 (0.9)           | 0                 | 0                                               |
| Viral rash, n (%)                        | 0                  | 1 (0.9)           | 0                 | 0                                               |
| Acute sinusitis, n (%)                   | 1 (0.9)            | 0                 | 0                 | 0                                               |
| Adenoviral conjunctivitis, n (%)         | 0                  | 0                 | 0                 | 1 (1.0)                                         |
| Cellulitis, n (%)                        | 0                  | 0                 | 0                 | 1 (1.0)                                         |
| Ear infection, n (%)                     | 1 (0.9)            | 0                 | 0                 | 0                                               |
| Gingivitis, n (%)                        | 1 (0.9)            | 0                 | 0                 | 0                                               |
| Lower respiratory tract infection, n (%) | 0                  | 0                 | 0                 | 1 (1.0)                                         |
| Pneumonia mycoplasmal, n (%)             | 0                  | 0                 | 0                 | 1 (1.0)                                         |
| Rash pustular, n (%)                     | 0                  | 0                 | 0                 | 1 (1.0)                                         |
| Staphylococcal skin infection, n (%)     | 1 (0.9)            | 0                 | 0                 | 0                                               |
| Tracheitis, n (%)                        | 0                  | 0                 | 0                 | 1 (1.0)                                         |
| Viral infection, n (%)                   | 0                  | 0                 | 0                 | 1 (1.0)                                         |

Abbreviations: IXEQ4W=80 mg ixekizumab every 4 weeks; IXEQ2W=80 mg ixekizumab every 2 weeks; Q2W=every 2 weeks.

<sup>a</sup>The adalimumab 40 mg Q2W treatment arm served as active reference for comparison with placebo. The study was not powered to test equivalence or non-inferiority of ixekizumab versus adalimumab.

**Supplementary Table S4. Effect on dactylitis symptoms as measured by mean change from baseline in LDI-B score**

|                                                                                                                        | Placebo      |             | IXEQ4W        |               | IXEQ2W         |               | Adalimumab<br>40 mg Q2W <sup>a</sup> |                |
|------------------------------------------------------------------------------------------------------------------------|--------------|-------------|---------------|---------------|----------------|---------------|--------------------------------------|----------------|
| <b>Patients with presence of dactylitis<sup>b</sup> at baseline (pre-specified analysis)</b>                           |              |             |               |               |                |               |                                      |                |
|                                                                                                                        | N=39         |             | N=54          |               | N=41           |               | N=23                                 |                |
| LDI-B<br>Baseline (SD) <sup>c</sup>                                                                                    | 46.2 (65.5)  |             | 58.1 (96.7)   |               | 40.6 (54.6)    |               | 93.9 (111.9) †                       |                |
|                                                                                                                        | 12 weeks     | 24 weeks    | 12 weeks      | 24 weeks      | 12 weeks       | 24 weeks      | 12 weeks                             | 24 weeks       |
| LDI-B<br>mean change from<br>baseline (SE)                                                                             | -26.8 (7.1)  | -25.4 (6.5) | -54.7 (6.3) † | -57.1 (5.7) * | -47.5 (7.0) ‡  | -48.3 (6.3) † | -46.0 (8.8)                          | -57.1 (7.8) *  |
| <b>Patients with presence of dactylitis at baseline<sup>b</sup> and baseline LDI-B score &gt;0 (post-hoc analysis)</b> |              |             |               |               |                |               |                                      |                |
|                                                                                                                        | N=28         |             | N=39          |               | N=26           |               | N=18                                 |                |
| LDI-B<br>Baseline (SD) <sup>c</sup>                                                                                    | 62.7 (69.3)  |             | 73.0 (103.4)  |               | 64.0 (56.6)    |               | 119.9 (113.5) †                      |                |
|                                                                                                                        | 12 weeks     | 24 weeks    | 12 weeks      | 24 weeks      | 12 weeks       | 24 weeks      | 12 weeks                             | 24 weeks       |
| LDI-B<br>mean change from<br>baseline (SE) <sup>d</sup>                                                                | -36.3 (10.3) | -33.7 (9.7) | -72.8 (8.8) † | -75.4 (8.1) * | -63.9 (10.6) † | -66.1 (9.8) † | -62.1 (11.9)                         | -76.0 (10.9) * |

Abbreviations: IXEQ2W=80 mg ixekizumab once every 2 weeks; IXEQ4W=80 mg ixekizumab once every 4 weeks; LDI-B=Leeds Dactylitis Index-Basic; Q2W=every 2 weeks; SD=standard deviation; SE=standard error.

<sup>a</sup>The adalimumab 40 mg Q2W treatment arm served as active reference for comparison with placebo. The study was not powered to test equivalence or non-inferiority of ixekizumab versus adalimumab.

<sup>b</sup>As qualitatively assessed by the investigator.

<sup>c</sup>Additionally presented in Table 1.

<sup>d</sup>Additionally presented in Table 2.

\*p≤0.001 versus placebo.

†p≤0.01 versus placebo.

‡ $p \leq 0.025$  versus placebo.

‡ $p < 0.05$  versus placebo.
